# Supplementary material
Source: HighWire-hosted journal article supplement (https://jnis.bmj.com/content/11/8/801)
Supplement: inline-supplementary-material-3 [file inline-supplementary-material-3.docx]

Table II: Neuroform EZ® Stent and Neuroform Atlas® Stent Summary

|  | Neuroform EZ™ Stent | Neuroform Atlas™ Stent |
| --- | --- | --- |
| Stent Design | 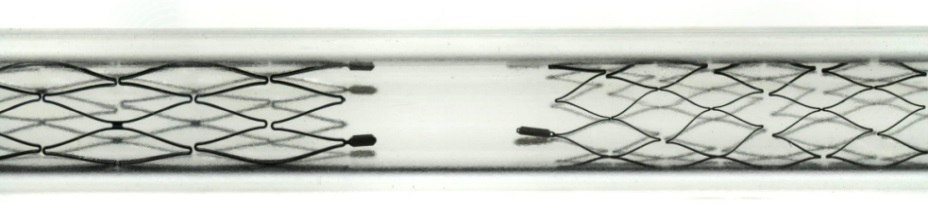 | 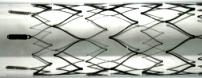 |
| Material | Nitinol, ASTM F2063-12 | Nitinol, ASTM F2063-12 |
| Design | Open cell | Open cell |
| Deployment | Self-Expanding | Self-Expanding |
| Vessel Diameter | 2.0-4.5 mm | 2.0-4.5 mm |
| Expanded Diameters (mm) | 3.0, 3.5, 4.0, 4.5, 5.0 | 3.5, 4.5, 5.0 |
| Lengths (mm) | 10, 15, 20, 30 | 15, 21, 24, 30 |
| Cells & Interconnects | 8 cells, 3 interconnects | 8/12 cells, 4 interconnects |
| End ring Design | Unflared | Flared |
| Radiopaque Markers | 4 per end, crimped sleeve, Pt/Ir alloy | 3 per end, crimped sleeve, Pt/Ir alloy |
